# Supplementary material
Source: PubMed Central journal article supplement (PMC9378358)
Supplement: NIHMS1788508-supplement-Supp_Figures.pdf [file NIHMS1788508-supplement-Supp_Figures.pdf]

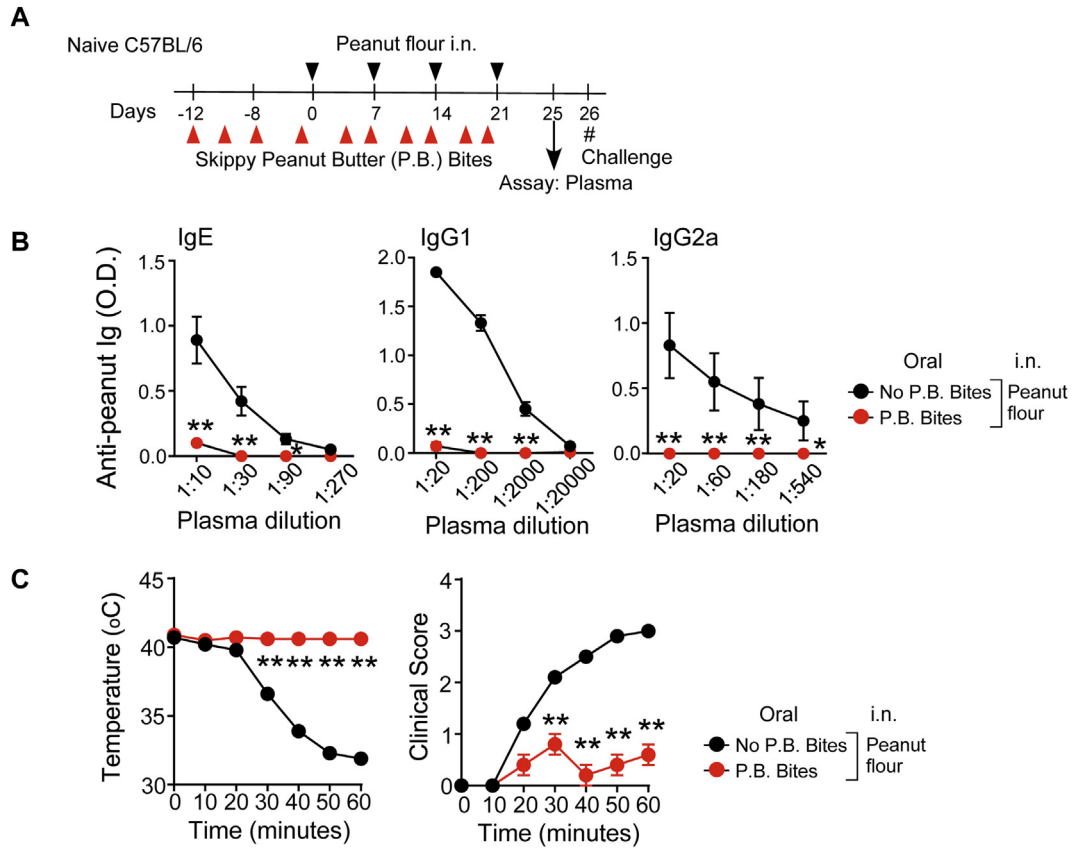

**FIG E1.** Oral *ad libitum* consumption of commercial solid peanut butter product Skippy PB Bites protects mice from developing peanut allergy. **(A)** Schematic overview of the experimental protocol. **(B)** On day 25, plasma levels of peanut-specific IgE, IgG<sub>1</sub>, and IgG<sub>2a</sub> were measured by ELISA. Serial dilution of plasma was used to determine antibody titers. **(C)** On day 26, mice were challenged by i.p. injection of peanut extract, and rectal temperature and clinical scores were monitored every 10 minutes. Data are presented as means  $\pm$  SEMs ( $n = 4-6$  in each group). \* $P < .05$  and \*\* $P < .01$  compared to mice that did not consume Skippy PB Bites and subjected to i.n. peanut flour exposure.



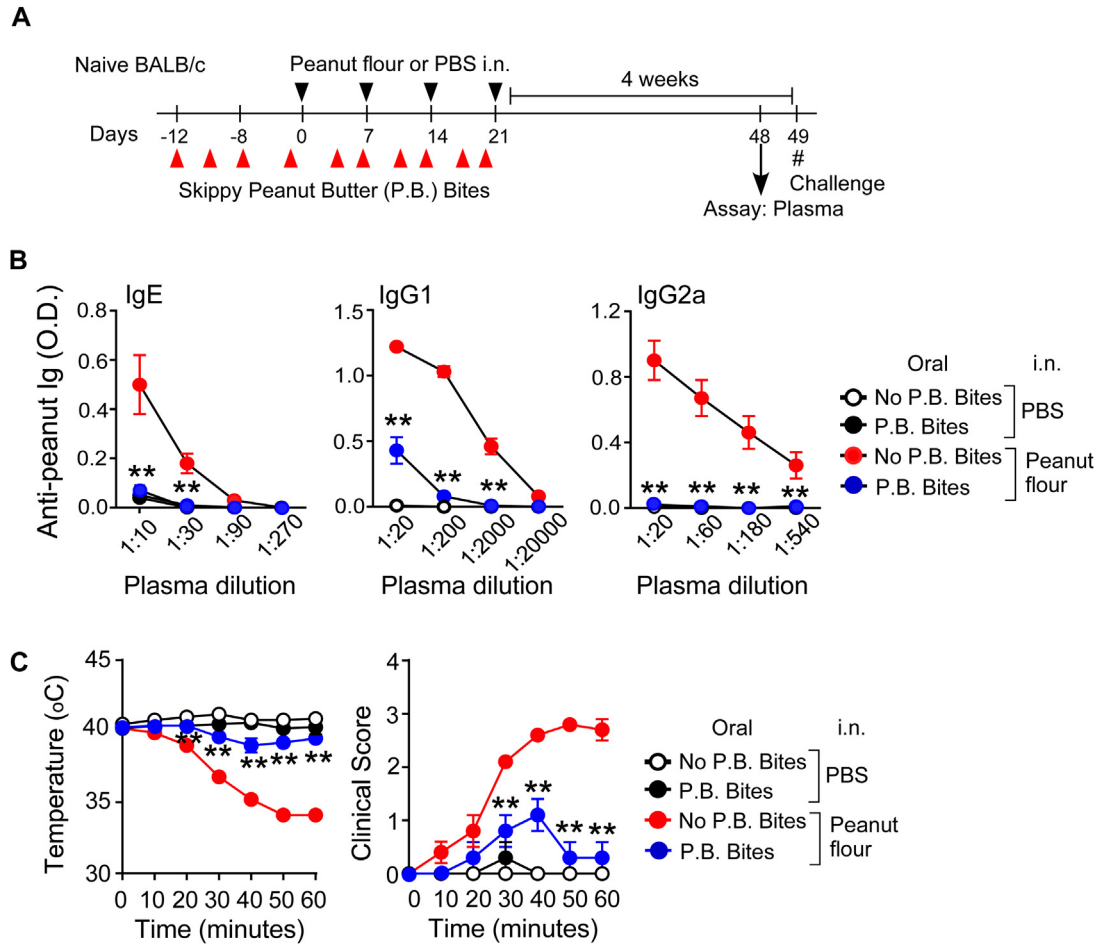

**FIG E3.** Oral consumption of a peanut butter product induces immunologic tolerance to inhaled peanut flour. **(A)** Schematic overview of the experimental protocol. Note that mice were allowed to rest for 4 weeks without any manipulations after the last consumption of Skippy PB Bites and then challenged by i.p. injection of peanut extract. **(B)** On day 48, plasma levels of peanut-specific IgE, IgG<sub>1</sub>, and IgG<sub>2a</sub> were measured by ELISA. Serial dilution of plasma was used to determine antibody titers. **(C)** On day 49, mice were challenged by i.p. injection of peanut extract, and rectal temperature and clinical scores were monitored every 10 minutes. Data are presented as means  $\pm$  SEMs ( $n = 4-6$  in each group). \*\* $P < .01$  compared to mice that did not consume Skippy PB Bites and subjected to i.n. peanut flour exposure.
